# Supplementary material for: lnc-3215 Suppression Leads to Calcium Overload in Selenium Deficiency-Induced Chicken Heart Lesion via the lnc-3215-miR-1594-TNN2 Pathway
Source: PubMed Central journal article supplement — Mol Ther Nucleic Acids. 2019 Aug 12;18:1–15. doi: 10.1016/j.omtn.2019.08.003 (PMC6726916; doi:10.1016/j.omtn.2019.08.003), 2019-08-12
Supplement: mmc1.pdf [file mmc1.pdf]

OMTN, Volume 18

## **Supplemental Information**

### **Inc-3215 Suppression Leads to Calcium Overload in Selenium Deficiency-Induced Chicken Heart Lesion via the Inc-3215-miR-1594-TNN2 Pathway**

**Jie Yang, Yafan Gong, Jingzeng Cai, Qi Liu, and Ziwei Zhang**

Fig. S1

a

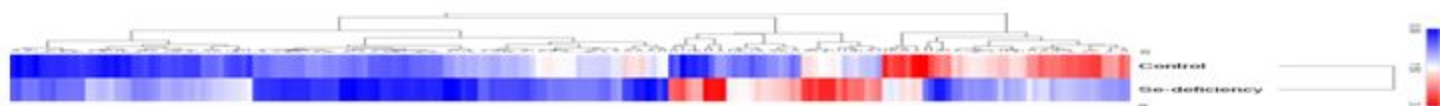

b

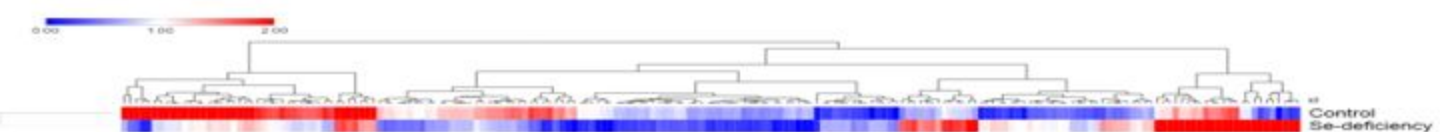

c

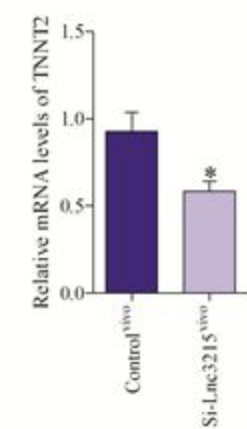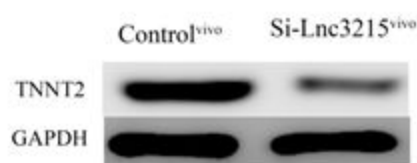

d

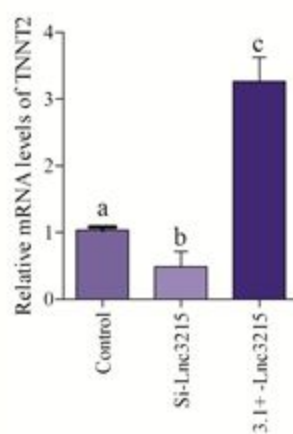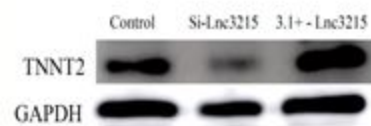

Table S1

| miRNA            | log2.Fold_change. | p.value  | STYLE |
|------------------|-------------------|----------|-------|
| gga-miR-122-5p   | 4.0852            | 7.82E-63 | UP    |
| gga-miR-122-3p   | 4.0674            | 0.013323 | UP    |
| gga-miR-1756a    | 3.548             | 0.25763  | UP    |
| gga-miR-194      | 3.3252            | 4.12E-31 | UP    |
| gga-miR-200a-5p  | 3.0334            | 0.38005  | UP    |
| gga-miR-215-3p   | 2.9265            | 0.24074  | UP    |
| gga-miR-1707     | 2.2261            | 0.58358  | UP    |
| gga-miR-18b-3p   | 2.2261            | 0.58358  | UP    |
| gga-miR-429-3p   | 1.9761            | 0.12614  | UP    |
| gga-miR-200a-3p  | 1.8358            | 4.74E-08 | UP    |
| gga-miR-101-1-5p | 1.811             | 0.68383  | UP    |
| gga-miR-1416-3p  | 1.811             | 0.68383  | UP    |
| gga-miR-1710     | 1.811             | 0.68383  | UP    |
| gga-miR-1727     | 1.811             | 0.68383  | UP    |
| gga-miR-6557-3p  | 1.811             | 0.68383  | UP    |
| gga-miR-6565-3p  | 1.811             | 0.68383  | UP    |
| gga-miR-6631-5p  | 1.811             | 0.68383  | UP    |
| gga-miR-1684a-3p | 1.6666            | 0.011214 | UP    |
| gga-miR-6544-5p  | 1.6411            | 0.53917  | UP    |
| gga-let-7a-2-3p  | 1.6184            | 0.3254   | UP    |
| gga-miR-138-5p   | 1.548             | 0.64395  | UP    |
| gga-miR-200b-3p  | 1.4834            | 0.001597 | UP    |
| gga-miR-6582-3p  | 1.4485            | 0.46534  | UP    |
| gga-miR-153-5p   | 1.2261            | 0.81268  | UP    |
| gga-miR-1676-5p  | 1.2261            | 0.81268  | UP    |
| gga-miR-1760     | 1.2261            | 0.81268  | UP    |
| gga-miR-3532-3p  | 1.2261            | 0.59619  | UP    |
| gga-miR-6544-3p  | 1.2261            | 0.63554  | UP    |
| gga-miR-455-3p   | 1.1503            | 0.003967 | UP    |
| gga-miR-3529     | 1.0334            | 0.59596  | UP    |
| gga-miR-1662     | 0.92651           | 0.11404  | UP    |
| gga-let-7f-3p    | 0.90414           | 0.54591  | UP    |
| gga-miR-29a-5p   | 0.90414           | 0.72735  | UP    |
| gga-miR-1456-5p  | 0.84756           | 0.60731  | UP    |
| gga-miR-130c-5p  | 0.81103           | 0.6717   | UP    |
| gga-miR-1708     | 0.81103           | 0.84967  | UP    |
| gga-miR-365-2-5p | 0.81103           | 0.84967  | UP    |
| gga-miR-6548-5p  | 0.81103           | 0.84967  | UP    |
| gga-miR-6566-5p  | 0.81103           | 0.84967  | UP    |
| gga-miR-6582-5p  | 0.81103           | 0.78867  | UP    |
| gga-miR-1434     | 0.76664           | 0.68134  | UP    |
| gga-miR-2131-5p  | 0.75894           | 0.23665  | UP    |

|                     |              |                |           |
|---------------------|--------------|----------------|-----------|
| gga-miR-130a-5p     | 0.75659      | 0.52775        | UP        |
| gga-miR-1416-5p     | 0.74919      | 0.000447       | UP        |
| gga-miR-187-3p      | 0.73627      | 0.50183        | UP        |
| gga-miR-29b-2-5p    | 0.73303      | 0.61256        | UP        |
| gga-miR-1569        | 0.7115       | 0.80339        | UP        |
| gga-miR-126-5p      | 0.70945      | 2.54E-29       | UP        |
| gga-miR-375         | 0.70251      | 0.60006        | UP        |
| gga-miR-146b-5p     | 0.69073      | 1.75E-82       | UP        |
| gga-miR-3523        | 0.68328      | 0.41975        | UP        |
| gga-miR-203a        | 0.66968      | 0.60995        | UP        |
| gga-miR-92-3p       | 0.6576       | 4.01E-78       | UP        |
| gga-miR-1655-5p     | 0.64111      | 0.81458        | UP        |
| gga-miR-1b-5p       | 0.64111      | 0.86829        | UP        |
| gga-miR-33-3p       | 0.64111      | 0.81458        | UP        |
| gga-miR-6648-3p     | 0.64111      | 0.86829        | UP        |
| gga-miR-223         | 0.63786      | 0.082881       | UP        |
| gga-miR-222b-5p     | 0.622        | 0.68978        | UP        |
| gga-miR-181a-5p     | 0.60595      | 1.37E-38       | UP        |
| gga-miR-204         | 0.58611      | 0.34491        | UP        |
| gga-miR-221-5p      | 0.56082      | 0.001306       | UP        |
| gga-miR-30e-3p      | 0.54861      | 8.53E-07       | UP        |
| gga-miR-2188-3p     | 0.548        | 0.83053        | UP        |
| <b>gga-miR-1594</b> | <b>0.548</b> | <b>0.87971</b> | <b>UP</b> |
| gga-miR-146a-5p     | 0.54784      | 6.10E-06       | UP        |
| gga-let-7j-3p       | 0.5222       | 0.53256        | UP        |
| gga-miR-155         | 0.52052      | 0.47197        | UP        |
| gga-miR-146a-3p     | 0.46649      | 0.25643        | UP        |
| gga-miR-34a-5p      | 0.46638      | 0.45869        | UP        |
| gga-miR-184-3p      | 0.452        | 0.26182        | UP        |
| gga-miR-301a-5p     | 0.44846      | 0.72204        | UP        |
| gga-miR-3531-5p     | 0.44846      | 0.89304        | UP        |
| gga-let-7f-5p       | 0.4444       | 4.42E-45       | UP        |
| gga-miR-128-3p      | 0.44424      | 1.80E-15       | UP        |
| gga-let-7a-3p       | 0.44398      | 0.3699         | UP        |
| gga-miR-27b-5p      | 0.43599      | 0.63349        | UP        |
| gga-miR-32-3p       | 0.42229      | 0.54265        | UP        |
| gga-miR-26a-5p      | 0.42204      | 1.93E-92       | UP        |
| gga-miR-133a-5p     | 0.41632      | 9.04E-05       | UP        |
| gga-miR-214         | 0.41146      | 0.041958       | UP        |
| gga-miR-22-3p       | 0.39789      | 3.26E-33       | UP        |
| gga-miR-30c-1-3p    | 0.37511      | 0.040165       | UP        |
| gga-miR-146c-3p     | 0.37275      | 0.34503        | UP        |
| gga-miR-106-3p      | 0.36981      | 0.68972        | UP        |
| gga-miR-1b-3p       | 0.36119      | 1.00E-30       | UP        |

|                  |         |          |    |
|------------------|---------|----------|----|
| gga-miR-22-5p    | 0.35805 | 0.44873  | UP |
| gga-miR-2131-3p  | 0.34343 | 0.79567  | UP |
| gga-miR-30c-2-3p | 0.33305 | 0.19836  | UP |
| gga-miR-6660-3p  | 0.32561 | 0.84486  | UP |
| gga-let-7g-5p    | 0.32376 | 3.15E-10 | UP |
| gga-miR-30d      | 0.32013 | 2.26E-23 | UP |
| gga-miR-490-5p   | 0.31722 | 0.78424  | UP |
| gga-miR-190a-5p  | 0.31684 | 0.80272  | UP |
| gga-miR-1786     | 0.28747 | 0.87745  | UP |
| gga-miR-454-3p   | 0.28702 | 0.4317   | UP |
| gga-miR-365-3p   | 0.28434 | 0.6347   | UP |
| gga-miR-24-3p    | 0.28306 | 0.07156  | UP |
| gga-miR-130b-3p  | 0.28233 | 0.30642  | UP |
| gga-miR-181b-5p  | 0.27943 | 0.19348  | UP |
| gga-miR-6550-3p  | 0.27854 | 0.91309  | UP |
| gga-miR-125b-3p  | 0.27406 | 0.54868  | UP |
| gga-miR-301b-5p  | 0.27312 | 0.78834  | UP |
| gga-let-7d       | 0.27069 | 0.7877   | UP |
| novel_2          | 0.26968 | 0.29342  | UP |
| gga-miR-16-5p    | 0.25845 | 0.25313  | UP |
| gga-miR-30a-3p   | 0.25318 | 0.43764  | UP |
| gga-miR-144-5p   | 0.24925 | 0.67588  | UP |
| gga-miR-221-3p   | 0.2315  | 0.48209  | UP |
| gga-miR-1677-3p  | 0.22729 | 0.70156  | UP |
| gga-miR-10b-3p   | 0.22607 | 0.98489  | UP |
| gga-miR-128-1-5p | 0.22607 | 0.94918  | UP |
| gga-miR-1456-3p  | 0.22607 | 0.99128  | UP |
| gga-miR-1550-3p  | 0.22607 | 0.98767  | UP |
| gga-miR-1618-5p  | 0.22607 | 0.99128  | UP |
| gga-miR-1626-5p  | 0.22607 | 0.98489  | UP |
| gga-miR-1685-3p  | 0.22607 | 0.99128  | UP |
| gga-miR-1685-5p  | 0.22607 | 0.99128  | UP |
| gga-miR-1728-3p  | 0.22607 | 0.99128  | UP |
| gga-miR-1779     | 0.22607 | 0.98767  | UP |
| gga-miR-1792     | 0.22607 | 0.99128  | UP |
| gga-miR-1795     | 0.22607 | 0.99128  | UP |
| gga-miR-1805-5p  | 0.22607 | 0.98489  | UP |
| gga-miR-183      | 0.22607 | 0.90311  | UP |
| gga-miR-200b-5p  | 0.22607 | 0.99128  | UP |
| gga-miR-29c-5p   | 0.22607 | 0.98767  | UP |
| gga-miR-30b-3p   | 0.22607 | 0.97108  | UP |
| gga-miR-3530-5p  | 0.22607 | 0.99128  | UP |
| gga-miR-3607-5p  | 0.22607 | 0.99128  | UP |
| gga-miR-6549-5p  | 0.22607 | 0.99128  | UP |

|                   |          |          |    |
|-------------------|----------|----------|----|
| gga-miR-6552-3p   | 0.22607  | 0.99128  | UP |
| gga-miR-6575-5p   | 0.22607  | 0.98767  | UP |
| gga-miR-6594-5p   | 0.22607  | 0.99128  | UP |
| gga-miR-6604-5p   | 0.22607  | 0.99128  | UP |
| gga-miR-7474-5p   | 0.22607  | 0.99128  | UP |
| novel_38          | 0.22607  | 0.97864  | UP |
| novel_39          | 0.22607  | 0.98767  | UP |
| novel_40          | 0.22607  | 0.98767  | UP |
| novel_41          | 0.22607  | 0.99128  | UP |
| novel_43          | 0.22607  | 0.99128  | UP |
| novel_7           | 0.22607  | 0.99128  | UP |
| gga-let-7a-5p     | 0.19412  | 0.3623   | UP |
| gga-miR-222a      | 0.18032  | 0.86539  | UP |
| gga-miR-26a-3p    | 0.17876  | 0.99109  | UP |
| gga-miR-133a-3p   | 0.16466  | 0.80605  | UP |
| gga-let-7i        | 0.15958  | 0.70189  | UP |
| gga-miR-1a-1-5p   | 0.15896  | 0.99368  | UP |
| gga-miR-135a-5p   | 0.15568  | 0.9916   | UP |
| gga-miR-23b-3p    | 0.14719  | 0.84763  | UP |
| gga-miR-30b-5p    | 0.13851  | 0.71429  | UP |
| gga-miR-218-5p    | 0.13658  | 0.20693  | UP |
| gga-miR-458b-5p   | 0.13553  | 0.17564  | UP |
| gga-miR-1781-3p   | 0.12986  | 0.9686   | UP |
| gga-miR-20a-5p    | 0.11425  | 0.20599  | UP |
| gga-miR-130b-5p   | 0.11079  | 0.79376  | UP |
| gga-miR-499-5p    | 0.10582  | 9.74E-94 | UP |
| gga-miR-148a-3p   | 0.10103  | 1.78E-14 | UP |
| gga-let-7c-5p     | 0.10103  | 0.36634  | UP |
| gga-miR-20b-5p    | 0.10092  | 0.69068  | UP |
| gga-let-7k-5p     | 0.091242 | 0.19495  | UP |
| gga-let-7c-3p     | 0.088567 | 0.96134  | UP |
| gga-miR-181b-2-3p | 0.088567 | 0.96134  | UP |
| gga-miR-206       | 0.088567 | 0.96134  | UP |
| novel_23          | 0.077207 | 0.90524  | UP |
| gga-let-7b        | 0.075232 | 0.016755 | UP |
| gga-miR-99a-5p    | 0.074621 | 1.21E-07 | UP |
| gga-miR-133c-3p   | 0.071337 | 0.005162 | UP |
| gga-miR-106-5p    | 0.070653 | 0.58412  | UP |
| gga-miR-99a-3p    | 0.057799 | 0.71538  | UP |
| gga-miR-133c-5p   | 0.033425 | 0.94471  | UP |
| gga-miR-1747-5p   | 0.033425 | 0.94471  | UP |
| gga-miR-21-5p     | 0.032062 | 4.14E-18 | UP |
| gga-miR-19a-3p    | 0.022711 | 0.55385  | UP |
| gga-miR-130c-3p   | 0.019304 | 0.61212  | UP |

|                  |          |          |      |
|------------------|----------|----------|------|
| gga-miR-301a-3p  | 0.014566 | 0.89602  | UP   |
| gga-miR-219a     | 0.01278  | 0.50754  | UP   |
| gga-miR-219b     | 0.01278  | 0.50754  | UP   |
| gga-miR-1559-5p  | 0.011431 | 0.3947   | UP   |
| gga-miR-3524a    | 0.009259 | 0.85021  | UP   |
| gga-miR-29a-3p   | 0.004684 | 0.64716  | UP   |
| gga-miR-29c-3p   | 0.004684 | 0.64716  | UP   |
| gga-miR-142-5p   | 0.003974 | 0.39656  | UP   |
| gga-miR-7        | 0.003678 | 0.060309 | UP   |
| gga-miR-18a-3p   | 0.003678 | 0.91127  | UP   |
| gga-miR-15c-5p   | -0.00354 | 0.53405  | DOWN |
| gga-miR-3538     | -0.00526 | 0.87058  | DOWN |
| novel_25         | -0.01137 | 0.60318  | DOWN |
| gga-miR-15b-3p   | -0.01494 | 0.90515  | DOWN |
| gga-miR-18a-5p   | -0.02329 | 0.6352   | DOWN |
| gga-miR-125b-5p  | -0.02658 | 4.61E-13 | DOWN |
| gga-miR-1454     | -0.0266  | 0.54004  | DOWN |
| novel_34         | -0.02912 | 0.00418  | DOWN |
| gga-miR-10a-5p   | -0.02992 | 9.11E-07 | DOWN |
| gga-miR-456-3p   | -0.03249 | 0.44314  | DOWN |
| gga-miR-1451-5p  | -0.05184 | 0.54606  | DOWN |
| gga-miR-107-3p   | -0.0632  | 0.064075 | DOWN |
| gga-miR-1744-3p  | -0.06344 | 0.89063  | DOWN |
| gga-miR-30a-5p   | -0.0717  | 1.90E-46 | DOWN |
| gga-miR-455-5p   | -0.07221 | 0.29057  | DOWN |
| gga-miR-146b-3p  | -0.0848  | 0.15884  | DOWN |
| gga-miR-10a-3p   | -0.08587 | 0.70067  | DOWN |
| gga-miR-15a      | -0.09085 | 0.33799  | DOWN |
| gga-miR-199-3p   | -0.09485 | 7.99E-36 | DOWN |
| gga-miR-137-3p   | -0.09586 | 0.91629  | DOWN |
| gga-miR-19b-3p   | -0.09827 | 0.12478  | DOWN |
| gga-miR-17-5p    | -0.10596 | 0.4603   | DOWN |
| gga-miR-1306-5p  | -0.10953 | 0.71954  | DOWN |
| gga-miR-499-3p   | -0.11578 | 0.000438 | DOWN |
| gga-miR-1451-3p  | -0.12185 | 0.84749  | DOWN |
| gga-miR-133b     | -0.12298 | 0.007501 | DOWN |
| gga-miR-222b-3p  | -0.12443 | 0.71125  | DOWN |
| gga-miR-138-2-3p | -0.12757 | 0.80172  | DOWN |
| gga-miR-100-5p   | -0.12937 | 3.24E-30 | DOWN |
| gga-miR-15b-5p   | -0.1298  | 0.43934  | DOWN |
| gga-miR-458a-3p  | -0.13233 | 0.1783   | DOWN |
| gga-miR-101-2-5p | -0.1365  | 0.87163  | DOWN |
| gga-miR-1677-5p  | -0.15008 | 0.6611   | DOWN |
| gga-miR-101-3p   | -0.15178 | 6.50E-42 | DOWN |

|                   |          |          |      |
|-------------------|----------|----------|------|
| gga-miR-301b-3p   | -0.15244 | 0.68356  | DOWN |
| gga-miR-16c-5p    | -0.15567 | 9.90E-08 | DOWN |
| gga-miR-147       | -0.16821 | 0.68832  | DOWN |
| gga-miR-1743      | -0.18897 | 0.90041  | DOWN |
| gga-miR-29b-1-5p  | -0.18897 | 0.90041  | DOWN |
| gga-miR-489-3p    | -0.18897 | 0.8284   | DOWN |
| gga-miR-1306-3p   | -0.20456 | 0.52996  | DOWN |
| gga-miR-138-1-3p  | -0.2145  | 0.77108  | DOWN |
| gga-miR-153-3p    | -0.22139 | 0.71008  | DOWN |
| gga-miR-27b-3p    | -0.22593 | 1.23E-48 | DOWN |
| gga-miR-146c-5p   | -0.23273 | 2.57E-20 | DOWN |
| gga-miR-142-3p    | -0.23656 | 0.13485  | DOWN |
| gga-miR-24-5p     | -0.24786 | 0.60991  | DOWN |
| gga-miR-29b-3p    | -0.24927 | 0.3439   | DOWN |
| gga-miR-490-3p    | -0.25165 | 1.05E-09 | DOWN |
| gga-miR-181a-3p   | -0.25184 | 0.049673 | DOWN |
| gga-miR-1397-5p   | -0.25936 | 0.84478  | DOWN |
| gga-miR-1668-3p   | -0.25936 | 0.84478  | DOWN |
| gga-miR-10b-5p    | -0.26542 | 0.000141 | DOWN |
| novel_29          | -0.26578 | 0.2604   | DOWN |
| gga-miR-103-3p    | -0.27312 | 1.79E-30 | DOWN |
| gga-miR-1729-5p   | -0.2786  | 0.1602   | DOWN |
| gga-miR-130a-3p   | -0.28688 | 0.37701  | DOWN |
| gga-miR-2188-5p   | -0.31238 | 9.99E-05 | DOWN |
| gga-miR-205a      | -0.3145  | 0.74064  | DOWN |
| gga-miR-193b-3p   | -0.35284 | 0.093608 | DOWN |
| gga-miR-1656      | -0.35889 | 0.87657  | DOWN |
| gga-miR-1805-3p   | -0.35889 | 0.64125  | DOWN |
| gga-miR-3540      | -0.35889 | 0.82614  | DOWN |
| gga-miR-365-1-5p  | -0.35889 | 0.82614  | DOWN |
| gga-miR-383-5p    | -0.35889 | 0.87657  | DOWN |
| gga-miR-6590-3p   | -0.35889 | 0.87657  | DOWN |
| gga-miR-6615-3p   | -0.35889 | 0.87657  | DOWN |
| gga-miR-1560-3p   | -0.3906  | 0.52135  | DOWN |
| gga-miR-140-5p    | -0.41393 | 2.40E-06 | DOWN |
| gga-miR-181b-1-3p | -0.42601 | 0.50744  | DOWN |
| gga-miR-190a-3p   | -0.42601 | 0.74033  | DOWN |
| gga-miR-1329-5p   | -0.44272 | 0.41988  | DOWN |
| gga-miR-1563      | -0.452   | 0.76901  | DOWN |
| gga-miR-23b-5p    | -0.452   | 0.76901  | DOWN |
| gga-miR-3525      | -0.49478 | 0.29863  | DOWN |
| gga-miR-1782      | -0.5109  | 0.80132  | DOWN |
| gga-miR-3531-3p   | -0.5109  | 0.80132  | DOWN |
| gga-miR-140-3p    | -0.54362 | 4.12E-45 | DOWN |



|                 |          |          |      |
|-----------------|----------|----------|------|
| gga-miR-6615-5p | -0.56243 | 0.60092  | DOWN |
| gga-miR-17-3p   | -0.58128 | 0.35851  | DOWN |
| gga-miR-3535    | -0.5999  | 0.43376  | DOWN |
| gga-miR-148a-5p | -0.60146 | 0.1587   | DOWN |
| gga-miR-3539    | -0.604   | 0.61448  | DOWN |
| gga-miR-460b-5p | -0.61043 | 0.52598  | DOWN |
| gga-miR-21-3p   | -0.62954 | 0.42465  | DOWN |
| gga-miR-18b-5p  | -0.63191 | 0.4844   | DOWN |
| gga-miR-6542-3p | -0.6484  | 0.53538  | DOWN |
| gga-miR-1729-3p | -0.66145 | 0.41518  | DOWN |
| gga-miR-365b-5p | -0.69147 | 0.25485  | DOWN |
| gga-miR-16-1-3p | -0.69993 | 0.54391  | DOWN |
| gga-miR-460a-5p | -0.75665 | 0.058427 | DOWN |
| gga-miR-1467-5p | -0.77393 | 0.83291  | DOWN |
| gga-miR-1620    | -0.77393 | 0.83291  | DOWN |
| gga-miR-1669    | -0.77393 | 0.83291  | DOWN |
| gga-miR-1720-5p | -0.77393 | 0.83291  | DOWN |
| gga-miR-1754-5p | -0.77393 | 0.83291  | DOWN |
| gga-miR-1769-3p | -0.77393 | 0.76543  | DOWN |
| gga-miR-187-5p  | -0.77393 | 0.83291  | DOWN |
| gga-miR-34b-3p  | -0.77393 | 0.83291  | DOWN |
| gga-miR-34c-3p  | -0.77393 | 0.83291  | DOWN |
| gga-miR-460b-3p | -0.77393 | 0.76543  | DOWN |
| gga-miR-6548-3p | -0.77393 | 0.7148   | DOWN |
| gga-miR-6669-3p | -0.77393 | 0.83291  | DOWN |
| novel_13        | -0.77393 | 0.83291  | DOWN |
| novel_24        | -0.77393 | 0.76543  | DOWN |
| novel_4         | -0.77393 | 0.76543  | DOWN |
| gga-miR-16-2-3p | -0.85193 | 0.48727  | DOWN |
| novel_1         | -0.86201 | 1.02E-29 | DOWN |
| novel_3         | -0.88863 | 2.08E-25 | DOWN |
| gga-miR-9-5p    | -0.93113 | 1.59E-05 | DOWN |
| gga-miR-33-5p   | -0.99632 | 0.15904  | DOWN |
| gga-miR-1663-3p | -0.99632 | 0.63876  | DOWN |
| gga-miR-20a-3p  | -0.99632 | 0.63876  | DOWN |
| gga-miR-20b-3p  | -1.0959  | 0.54942  | DOWN |
| gga-miR-1625-5p | -1.189   | 0.57161  | DOWN |
| gga-miR-1731-5p | -1.189   | 0.42371  | DOWN |
| gga-miR-144-3p  | -1.1943  | 2.77E-06 | DOWN |
| gga-miR-32-5p   | -1.2629  | 5.05E-14 | DOWN |
| gga-miR-34b-5p  | -1.2633  | 0.075184 | DOWN |
| gga-miR-1651-3p | -1.3589  | 0.70508  | DOWN |
| gga-miR-1682    | -1.3589  | 0.70508  | DOWN |
| gga-miR-1728-5p | -1.3589  | 0.70508  | DOWN |

|                  |         |          |      |
|------------------|---------|----------|------|
| gga-miR-3528     | -1.3589 | 0.59248  | DOWN |
| gga-miR-3536     | -1.3589 | 0.39739  | DOWN |
| gga-miR-3607-3p  | -1.3589 | 0.70508  | DOWN |
| gga-miR-6699-5p  | -1.3589 | 0.70508  | DOWN |
| novel_5          | -1.3589 | 0.70508  | DOWN |
| gga-miR-34c-5p   | -1.3954 | 0.15969  | DOWN |
| gga-miR-216b     | -1.426  | 0.29024  | DOWN |
| gga-miR-6606-5p  | -1.431  | 0.14788  | DOWN |
| gga-miR-1635     | -1.5813 | 0.52393  | DOWN |
| gga-miR-1329-3p  | -1.7739 | 0.60499  | DOWN |
| gga-miR-1453     | -1.7739 | 0.60499  | DOWN |
| gga-miR-1712-3p  | -1.7739 | 0.60499  | DOWN |
| gga-miR-9-3p     | -1.7739 | 0.60499  | DOWN |
| gga-miR-7b       | -1.9145 | 3.70E-30 | DOWN |
| gga-miR-1649-5p  | -2.0959 | 0.52374  | DOWN |
| gga-miR-449a     | -2.0959 | 0.52374  | DOWN |
| novel_22         | -2.0959 | 0.52374  | DOWN |
| gga-miR-1684b-3p | -2.2479 | 0.036112 | DOWN |
| gga-miR-217-5p   | -2.5288 | 0.020579 | DOWN |
| gga-miR-1551-5p  | -2.5813 | 0.39965  | DOWN |
| gga-miR-1737     | -3.4744 | 0.19271  | DOWN |

Tabel S2

| transcript_id  | log2(foldchange) | pvalue   | STYLE |
|----------------|------------------|----------|-------|
| TCONS_14281100 | 1.79106          | 0.01205  | UP    |
| TCONS_14342613 | 1.72696          | 0.0012   | UP    |
| XM_003643590.2 | 1.71449          | 0.00115  | UP    |
| NM_001277427.1 | 1.62343          | 0.00505  | UP    |
| XM_004935740.1 | 1.61929          | 5.00E-05 | UP    |
| XM_422502.3    | 1.61276          | 5.00E-05 | UP    |
| NM_205471.1    | 1.60205          | 0.0016   | UP    |
| TCONS_09082975 | 1.57447          | 0.01385  | UP    |
| XM_415405.4    | 1.5696           | 5.00E-05 | UP    |
| XM_422282.4    | 1.56834          | 5.00E-05 | UP    |
| NM_204441.1    | 1.54942          | 0.007    | UP    |
| NM_001130741.1 | 4.32692          | 0.00105  | UP    |
| NM_001277698.1 | 4.26786          | 0.0014   | UP    |
| NM_204882.1    | 3.91336          | 5.00E-05 | UP    |
| XM_001233227.3 | 3.90344          | 0.00065  | UP    |
| XM_003643568.2 | 3.57488          | 0.00295  | UP    |
| NM_001044633.1 | 3.41834          | 5.00E-05 | UP    |
| NM_001109784.1 | 3.25677          | 0.0033   | UP    |
| NM_001001616.1 | 3.09228          | 5.00E-05 | UP    |
| NM_001001193.1 | 2.63855          | 0.0101   | UP    |
| XM_419618.4    | 2.63384          | 5.00E-05 | UP    |
| NM_204745.1    | 2.61559          | 0.00015  | UP    |
| XM_004949789.1 | 2.58529          | 0.0002   | UP    |
| XM_001234022.3 | 2.53805          | 0.001    | UP    |
| TCONS_20554109 | 2.44207          | 0.0002   | UP    |
| Novel002158.1  | 2.30127          | 0.00695  | UP    |
| XM_430508.4    | 2.13445          | 0.0062   | UP    |
| XM_003643721.2 | 2.12376          | 0.00595  | UP    |
| XM_004950214.1 | 2.11925          | 0.0069   | UP    |
| NM_001144849.2 | 1.95647          | 5.00E-05 | UP    |
| XM_418376.4    | 1.52214          | 0.0062   | UP    |
| XM_426427.4    | 1.48118          | 0.00075  | UP    |
| NM_204667.1    | 1.4774           | 0.0003   | UP    |
| XM_004949945.1 | 1.44082          | 0.0003   | UP    |
| NM_205294.1    | 1.40504          | 0.0013   | UP    |
| NM_205168.3    | 1.40387          | 0.0113   | UP    |
| XM_004945682.1 | 1.36717          | 0.00315  | UP    |
| TCONS_13088357 | 1.34709          | 0.00065  | UP    |
| XM_417192.4    | 1.34408          | 0.0042   | UP    |
| XM_003642787.2 | 1.34155          | 0.0019   | UP    |

|                    |          |          |    |
|--------------------|----------|----------|----|
| ALDBGALT0000002101 | 1.31339  | 0.00325  | UP |
| XM_003641047.2     | 1.31308  | 0.0009   | UP |
| NM_001030640.1     | 1.31105  | 0.00115  | UP |
| NM_001033642.1     | 1.20371  | 0.0003   | UP |
| ALDBGALT0000005352 | 1.189    | 0.00085  | UP |
| NM_001006264.1     | 1.17481  | 0.00445  | UP |
| XM_414669.3        | 1.14405  | 0.00145  | UP |
| TCONS_14354749     | 1.12109  | 0.00895  | UP |
| NM_001030991.1     | 1.10693  | 0.00125  | UP |
| NM_001008455.1     | 1.09651  | 0.0043   | UP |
| XM_001233677.3     | 1.30175  | 0.001    | UP |
| XM_003641119.2     | 1.2859   | 0.00205  | UP |
| XM_417392.4        | 1.28382  | 0.0092   | UP |
| XM_414018.4        | 1.28235  | 0.0094   | UP |
| TCONS_09063318     | 1.27165  | 0.0112   | UP |
| NM_001039597.1     | 1.24     | 0.0019   | UP |
| TCONS_00646547     | 1.23953  | 0.00155  | UP |
| TCONS_07214998     | 1.2169   | 0.0123   | UP |
| XM_419723.4        | 1.08923  | 0.00475  | UP |
| XM_004945665.1     | 1.05463  | 0.0001   | UP |
| NM_204327.2        | 1.03928  | 0.00095  | UP |
| XM_003642970.2     | 1.0319   | 0.0002   | UP |
| XM_001235437.3     | 1.01758  | 0.0012   | UP |
| TCONS_04053929     | 1.01046  | 5.00E-05 | UP |
| XM_004943127.1     | 1.00967  | 0.0154   | UP |
| XM_417036.4        | 1.00866  | 0.00995  | UP |
| NM_001037839.1     | 0.9913   | 0.0113   | UP |
| XM_004941226.1     | 0.983819 | 0.00365  | UP |
| XM_429205.4        | 0.968896 | 0.00365  | UP |
| XM_003642909.2     | 0.945714 | 0.0101   | UP |
| XM_004939923.1     | 0.942907 | 0.001    | UP |
| XM_416863.3        | 0.91721  | 0.0008   | UP |
| ALDBGALT0000002946 | 0.913925 | 0.00545  | UP |
| XM_004945664.1     | 0.912453 | 0.0016   | UP |
| XM_418985.3        | 0.908889 | 0.01415  | UP |
| NM_204605.1        | 0.905415 | 0.00245  | UP |
| XM_003642236.2     | 0.902251 | 0.00355  | UP |
| XM_418581.4        | 0.878662 | 0.00385  | UP |
| TCONS_19504485     | 0.86588  | 0.01125  | UP |
| TCONS_00513805     | 0.716863 | 0.00865  | UP |
| XM_003641130.2     | 0.70379  | 0.00575  | UP |
| XM_418588.4        | 0.668287 | 0.00515  | UP |
| Novel001341.1      | 0.63607  | 0.0106   | UP |
| XLOC_1553250       | 0.615489 | 0.0053   | UP |

|                    |           |          |      |
|--------------------|-----------|----------|------|
| TCONS_05366281     | 0.536215  | 0.015    | UP   |
| TCONS_15203807     | 0.843659  | 0.0071   | UP   |
| TCONS_16526414     | 0.838499  | 0.01165  | UP   |
| XM_421454.4        | 0.8278    | 0.00105  | UP   |
| NM_001077233.1     | 0.78049   | 0.00765  | UP   |
| XM_001235375.2     | 0.778934  | 0.00155  | UP   |
| NM_001031339.1     | 0.749155  | 0.0077   | UP   |
| XM_427075.4        | 0.742957  | 0.0115   | UP   |
| XM_419478.4        | 0.738859  | 0.0043   | UP   |
| NM_001199806.1     | 0.725261  | 0.0033   | UP   |
| XM_422163.4        | -0.619224 | 0.0024   | DOWN |
| Novel000593.1      | -0.642856 | 0.0061   | DOWN |
| XM_421724.4        | -0.892722 | 0.00545  | DOWN |
| XM_417157.4        | -0.918563 | 0.0021   | DOWN |
| NM_001199550.1     | -0.919041 | 0.0037   | DOWN |
| XM_004935241.1     | -0.930023 | 0.003    | DOWN |
| ALDBGALT0000002779 | -0.932254 | 0.01365  | DOWN |
| XM_425694.4        | -0.9716   | 0.00295  | DOWN |
| NM_204810.1        | -0.972545 | 0.0068   | DOWN |
| NM_204335.1        | -1.00366  | 0.0051   | DOWN |
| XM_416843.4        | -1.04916  | 0.00445  | DOWN |
| NM_001127439.1     | -1.07259  | 0.0093   | DOWN |
| NM_001030740.1     | -1.09971  | 0.00085  | DOWN |
| NM_001001756.1     | -1.12639  | 0.0022   | DOWN |
| XM_425187.3        | -1.13153  | 0.0141   | DOWN |
| XM_004950690.1     | -1.13185  | 0.01015  | DOWN |
| NM_001197236.1     | -1.14459  | 0.00085  | DOWN |
| NM_001048079.1     | -1.47405  | 0.01185  | DOWN |
| NM_204819.1        | -1.47477  | 0.00155  | DOWN |
| NM_001030345.2     | -1.4941   | 0.0027   | DOWN |
| NM_001277738.1     | -1.61147  | 0.0008   | DOWN |
| Novel002569.1      | -1.62143  | 0.00935  | DOWN |
| XM_004950894.1     | -1.6341   | 0.0037   | DOWN |
| NM_205009.2        | -1.65992  | 5.00E-05 | DOWN |
| XM_004946122.1     | -1.15246  | 0.0132   | DOWN |
| NM_001142254.1     | -1.15405  | 0.00675  | DOWN |
| NM_205280.1        | -1.16902  | 0.0091   | DOWN |
| XM_424502.4        | -1.18534  | 0.01235  | DOWN |
| TCONS_00098255     | -1.19239  | 0.0122   | DOWN |
| XM_004948161.1     | -1.23136  | 0.00715  | DOWN |
| XM_415354.4        | -1.28438  | 0.0116   | DOWN |
| XM_004946982.1     | -1.29324  | 0.00225  | DOWN |
| XM_415100.4        | -1.30119  | 0.0003   | DOWN |
| XM_004948643.1     | -1.31365  | 0.01005  | DOWN |

|                           |                 |          |             |
|---------------------------|-----------------|----------|-------------|
| TCONS_00303679            | -1.31459        | 0.00195  | DOWN        |
| TCONS_07772806            | -1.32741        | 0.0124   | DOWN        |
| XM_426306.3               | -1.38373        | 0.011    | DOWN        |
| XM_004950163.1            | -1.3891         | 0.00815  | DOWN        |
| TCONS_08900221            | -1.41599        | 0.0079   | DOWN        |
| XM_422447.3               | -0.675352       | 0.01375  | DOWN        |
| <b>ALDBGALG0000003215</b> | <b>-1.60132</b> | <b>1</b> | <b>DOWN</b> |
| NM_001001302.1            | -0.710206       | 0.0138   | DOWN        |
| XM_001233940.3            | -0.735192       | 0.0144   | DOWN        |
| NM_001195122.1            | -0.803284       | 0.00485  | DOWN        |
| Novel001401.1             | -0.831956       | 0.00575  | DOWN        |
| XM_003642826.2            | -0.850511       | 0.00165  | DOWN        |
| XM_004940016.1            | -0.855355       | 0.00475  | DOWN        |
| NM_001134359.1            | -0.868838       | 0.0097   | DOWN        |
| NM_001112799.1            | -0.885007       | 0.00725  | DOWN        |
| NM_001098608.1            | -1.69674        | 0.0032   | DOWN        |
| TCONS_00109158            | -1.70034        | 0.0133   | DOWN        |
| TCONS_00405156            | -2.70032        | 0.0095   | DOWN        |
| NM_001270816.1            | -2.75059        | 0.0031   | DOWN        |
| XM_001236523.3            | -2.97284        | 0.00105  | DOWN        |
| XM_003643836.2            | -3.25254        | 5.00E-05 | DOWN        |
| NM_001159663.1            | -3.34543        | 0.00045  | DOWN        |
| Novel000456.1             | -3.45124        | 0.0134   | DOWN        |
| Novel000364.1             | -3.54202        | 0.0087   | DOWN        |
| Novel000382.1             | -3.67075        | 0.0005   | DOWN        |
| XM_423120.4               | -2.12899        | 0.0009   | DOWN        |
| XM_424715.4               | -2.15758        | 5.00E-05 | DOWN        |
| NM_204578.1               | -2.18995        | 0.00205  | DOWN        |
| NM_204700.2               | -2.27015        | 0.0016   | DOWN        |
| XM_419455.4               | -2.31123        | 0.0115   | DOWN        |
| XM_004950126.1            | -2.32167        | 0.00385  | DOWN        |
| XM_004950527.1            | -2.34653        | 0.00165  | DOWN        |
| XM_004949826.1            | -2.62642        | 0.00065  | DOWN        |
| TCONS_00032737            | -2.64996        | 0.00015  | DOWN        |
| Novel000386.1             | -2.66317        | 0.00175  | DOWN        |
